# Supplementary material
Source: PubMed Central journal article supplement (PMC6646280)
Supplement: ao8b01903_si_001.pdf [file ao8b01903_si_001.pdf]

# Supporting Information

## Biomass-mediated Synthesis of Cu-Doped TiO<sub>2</sub> Nanoparticles for Improved Performance Lithium- Ion Batteries

*Anil A. Kashale,<sup>†,‡,§</sup> Pravin K. Dwivedi,<sup>⊥</sup> Bhaskar R. Sathe,<sup>‡</sup> Manjusha V. Shelke,<sup>⊥</sup> Jia-Yaw Chang,<sup>#\*</sup> and Anil V. Ghule<sup>‡§\*</sup>*

<sup>†</sup> Department of Nanotechnology, Dr. Babasaheb Ambedkar Marathwada University, Aurangabad 431004, Maharashtra, India.

<sup>‡</sup> Department of Chemistry, Dr. Babasaheb Ambedkar Marathwada University, Aurangabad 431004, Maharashtra, India.

<sup>⊥</sup> Physical and Materials Chemistry Division CSIR-National Chemical Laboratory (CSIR-NCL) Pune 411008, MH, India.

<sup>#</sup> Department of Chemical Engineering, National Taiwan University of Science and Technology, Taipei 10607, Taiwan.

<sup>§</sup> Department of Chemistry, Shivaji University, Kolhapur 416004, Maharashtra, India

\* Corresponding author:

Anil V. Ghule, Email: [anighule@gmail.com](mailto:anighule@gmail.com), [avg\\_chem@unishivaji.ac.in](mailto:avg_chem@unishivaji.ac.in)

Jia-Yaw Chang, Email: [jychang@mail.nthust.edu.tw](mailto:jychang@mail.nthust.edu.tw)

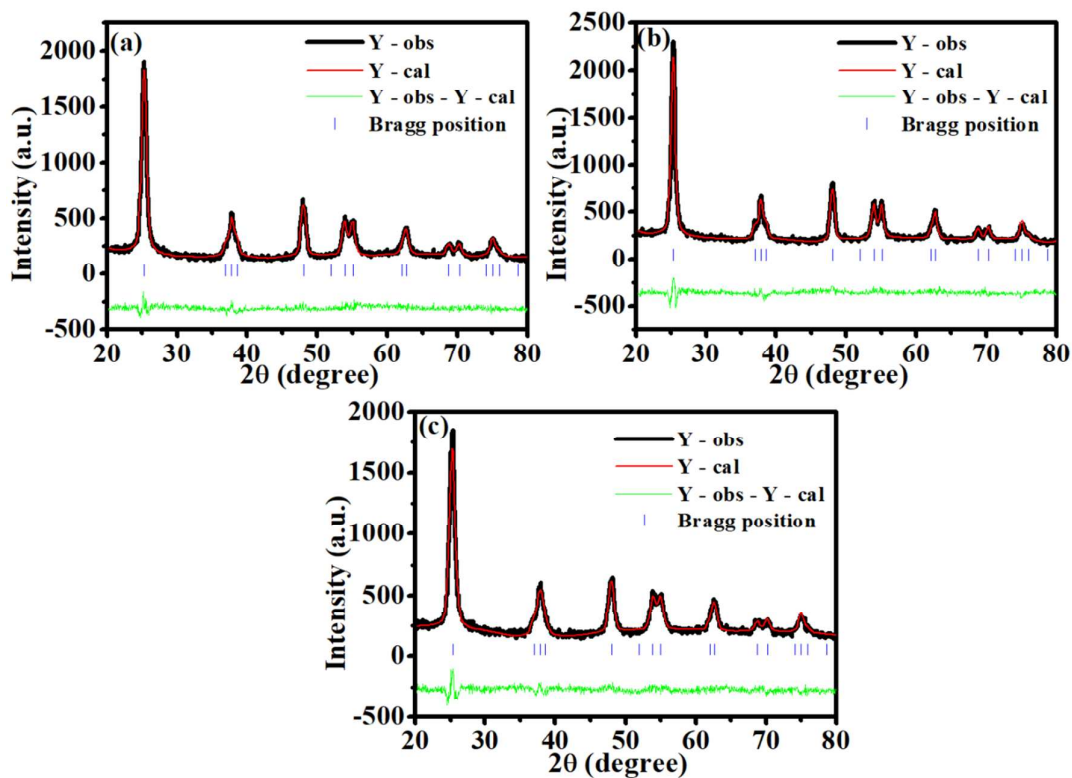

**Figure S1** Representative Rietveld refinement plot of biosynthesized (a) pure TiO<sub>2</sub> (b) 3% Cu -TiO<sub>2</sub> and (c) 7% Cu -TiO<sub>2</sub>.

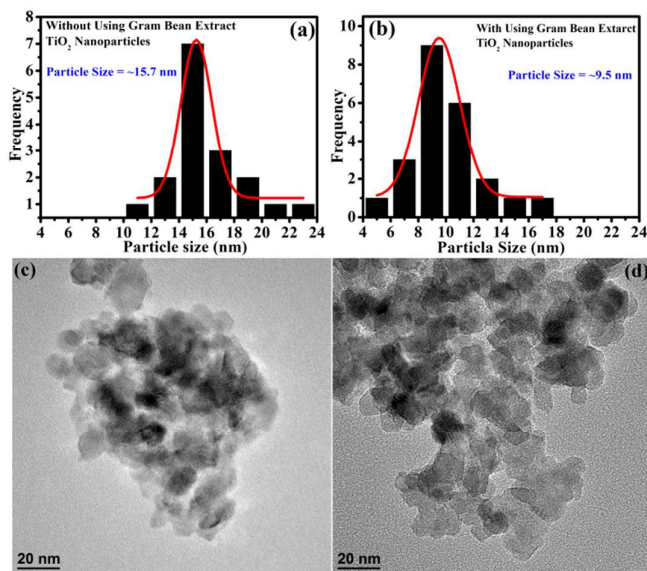

**Figure S2.** Particle size distribution histograms and representative TEM images of TiO<sub>2</sub> nanoparticles prepared without the use of Bengal gram bean extract and with using Bengal gram bean extract.

**Table S1.** Results of crystal analyses by Rietveld refinements of pure TiO<sub>2</sub>, 3% Cu-doped TiO<sub>2</sub> and 7% Cu-doped TiO<sub>2</sub>.

| Sample                       | <i>a, b</i> (Å) | <i>c</i> (Å) | <i>α, β, γ</i> (°) | <i>V</i> (Å <sup>3</sup> ) | $\chi^{2c}$ |
|------------------------------|-----------------|--------------|--------------------|----------------------------|-------------|
| Pure TiO <sub>2</sub>        | 3.7847          | 9.5067       | 90                 | 136.174                    | 1.661       |
| 3% Cu-doped TiO <sub>2</sub> | 3.7856          | 9.5049       | 90                 | 136.213                    | 1.602       |
| 7% Cu-doped TiO <sub>2</sub> | 3.7879          | 9.5010       | 90                 | 136.322                    | 1.629       |

**Table S2.** Comparative specific capacitance of first six charge-discharge cycles of pure TiO<sub>2</sub>, 3% Cu-doped TiO<sub>2</sub> and 7% Cu-doped TiO<sub>2</sub>.

| Anode Material                | Cycle Number    | Discharge Capacity<br>mA h g <sup>-1</sup> | Charge Capacity<br>mA h g <sup>-1</sup> | Irreversible Capacity<br>mA h g <sup>-1</sup> |
|-------------------------------|-----------------|--------------------------------------------|-----------------------------------------|-----------------------------------------------|
| Pure TiO <sub>2</sub>         | 1 <sup>st</sup> | 514                                        | 291                                     | 223                                           |
|                               | 2 <sup>nd</sup> | 292                                        | 269                                     | 23                                            |
|                               | 3 <sup>rd</sup> | 280                                        | 262                                     | 18                                            |
|                               | 4 <sup>th</sup> | 269                                        | 257                                     | 12                                            |
|                               | 5 <sup>th</sup> | 263                                        | 254                                     | 9                                             |
|                               | 6 <sup>th</sup> | 260                                        | 252                                     | 8                                             |
| 3 % Cu-doped TiO <sub>2</sub> | 1 <sup>st</sup> | 517                                        | 292                                     | 225                                           |
|                               | 2 <sup>nd</sup> | 314                                        | 271                                     | 43                                            |
|                               | 3 <sup>rd</sup> | 284                                        | 264                                     | 20                                            |
|                               | 4 <sup>th</sup> | 276                                        | 260                                     | 16                                            |
|                               | 5 <sup>th</sup> | 264                                        | 257                                     | 7                                             |
|                               | 6 <sup>th</sup> | 264                                        | 257                                     | 7                                             |
| 7 % Cu-doped TiO <sub>2</sub> | 1 <sup>st</sup> | 748                                        | 398                                     | 350                                           |
|                               | 2 <sup>nd</sup> | 378                                        | 353                                     | 25                                            |
|                               | 3 <sup>rd</sup> | 356                                        | 340                                     | 16                                            |
|                               | 4 <sup>th</sup> | 342                                        | 334                                     | 8                                             |
|                               | 5 <sup>th</sup> | 333                                        | 326                                     | 7                                             |
|                               | 6 <sup>th</sup> | 329                                        | 323                                     | 6                                             |

**Table S3.** Comparative rate capability of pure TiO<sub>2</sub>, 3% Cu-doped TiO<sub>2</sub> and 7% Cu-doped TiO<sub>2</sub>.

| Current Rate (A g <sup>-1</sup> ) | Specific Capacitance of Pure TiO <sub>2</sub> (mAh g <sup>-1</sup> ) | Specific Capacitance of 3 % Cu-doped TiO <sub>2</sub> (mAh g <sup>-1</sup> ) | Specific Capacitance of 7 % Cu-doped TiO <sub>2</sub> (mAh g <sup>-1</sup> ) |
|-----------------------------------|----------------------------------------------------------------------|------------------------------------------------------------------------------|------------------------------------------------------------------------------|
| 0.05                              | 276                                                                  | 296                                                                          | 378                                                                          |
| 0.1                               | 249                                                                  | 254                                                                          | 330                                                                          |
| 0.25                              | 216                                                                  | 217                                                                          | 279                                                                          |
| 0.5                               | 181                                                                  | 185                                                                          | 230                                                                          |
| 1                                 | 143                                                                  | 156                                                                          | 189                                                                          |
| 2                                 | 119                                                                  | 134                                                                          | 157                                                                          |
| 0.1                               | 239                                                                  | 253                                                                          | 299                                                                          |
